# Supplementary material for: Fabrication and physical properties of self-assembled ultralong polymer/small molecule hybrid microstructures
Source: Royal Society of Chemistry journal article supplement (doi:10.1039/c5ra01167a), 2015-01-01
Supplement: c5ra01167a1.pdf [file c5ra01167a1.pdf]

*Electronic Supplementary Information (ESI)*

## **Fabrication and Physical Properties of Self-Assembled Ultralong Polymer/small molecule Hybrid Microstructures**

**Jing Zhang,<sup>a</sup> Chengyuan Wang,<sup>a</sup> Wanqiao Chen,<sup>a</sup> Jiansheng Wu,<sup>a</sup> Qichun Zhang<sup>a,b\*</sup>**

*<sup>a</sup>School of Materials Science and Engineering, Nanyang Technological University, Singapore 639798, Singapore.*

*<sup>b</sup>Division of Chemistry and Biological Chemistry, School of Physical and Mathematical Sciences, Nanyang Technological University, Singapore 637371, Singapore*

**\*Correspondence:** [gc Zhang@ntu.edu.sg](mailto:gc Zhang@ntu.edu.sg)

### **Table of Contents**

|                                                                          |      |
|--------------------------------------------------------------------------|------|
| <b>Figure S1.</b> PL spectra of P3HT, TCNQ and P3HT/TCNQ complex.        | (S2) |
| <b>Figure S2.</b> Optical images of P3HT film and TCNQ microplates.      | (S3) |
| <b>Figure S2.</b> Detailed optical images of numbers of P3HT-TCNQ hybrid | (S4) |
| <b>Figure S2.</b> Power X-ray diffraction pattern                        | (S5) |

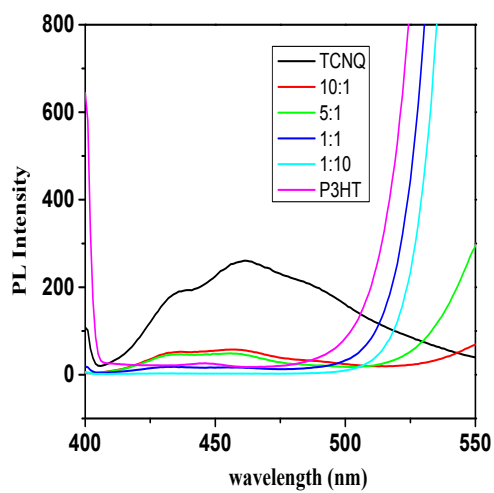

**Figure S1.** PL spectra of P3HT, TCNQ and P3HT/TCNQ complex.

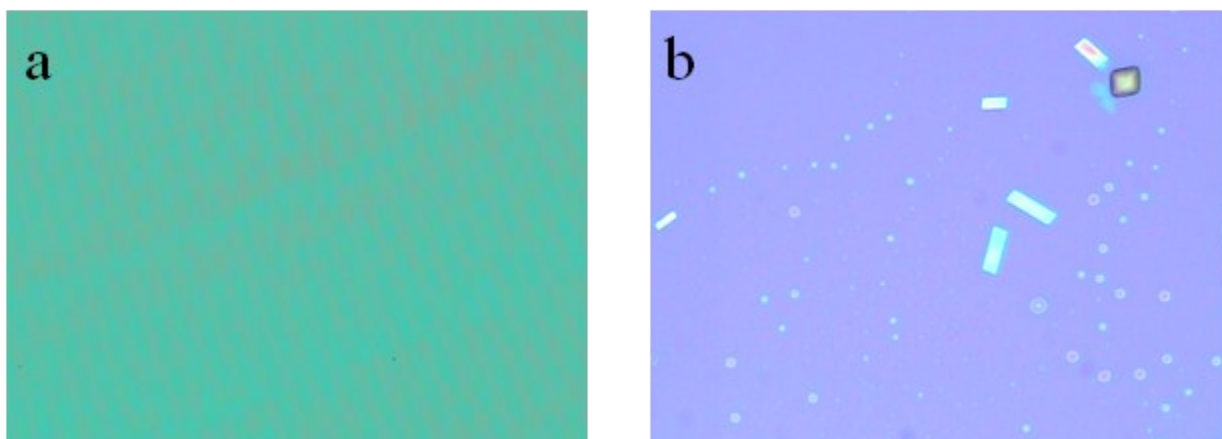

**Figure S2.** Optical images of P3HT film and TCNQ microplates obtained by the drop-casting method. We observed that the polymer molecules gathered to form continuous film and TCNQ tend to pack into microplates after solvent evaporation.

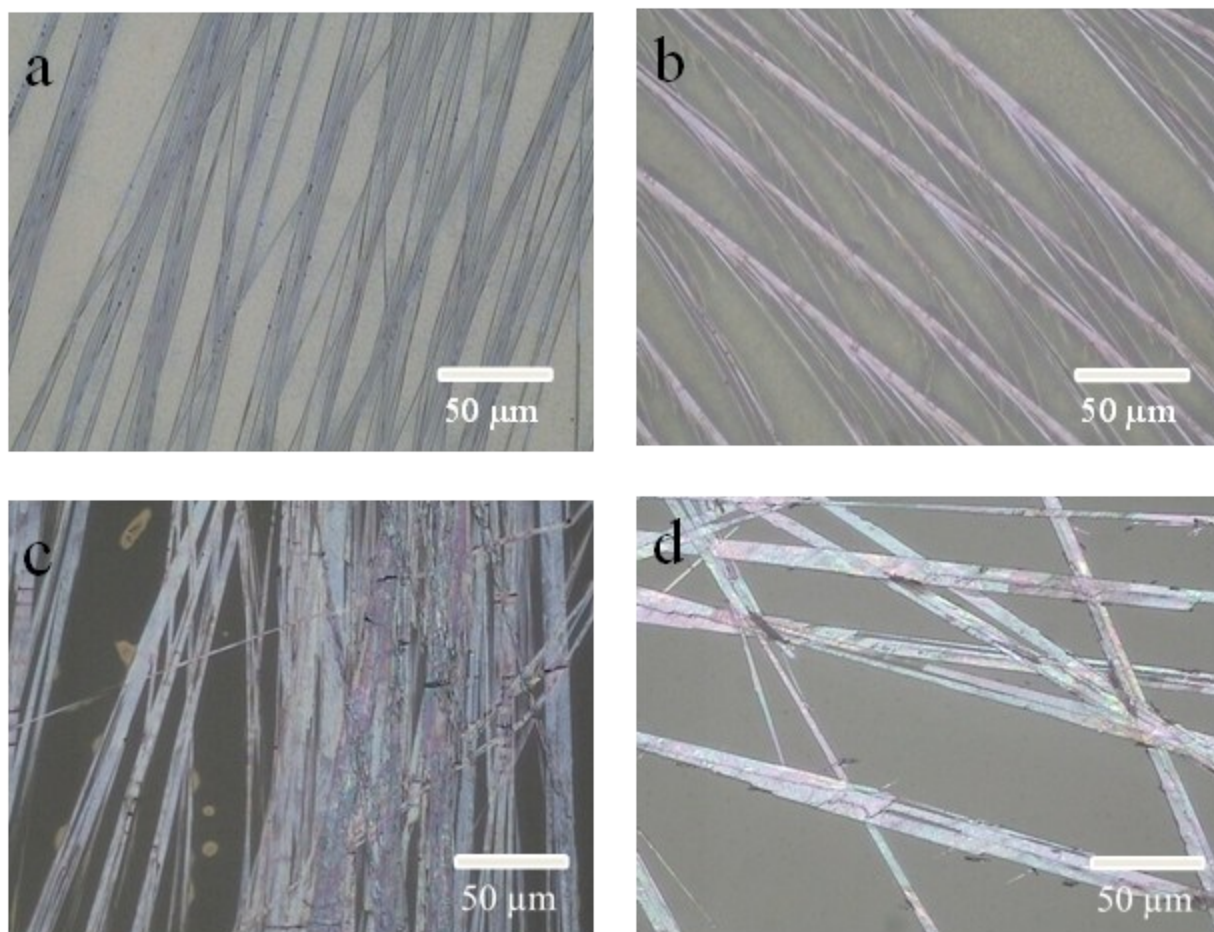

**Figure S3.** Detailed optical images of numbers of P3HT-TCNQ hybrid microstructures obtained by the drop-casting method with different mass ratio: 10:1 (a), 5:1 (b), 1:1 (c), 1:10 (d). With the decrease of polymer content, hybrid wires tend to gather and form confluent plate-like architecture.

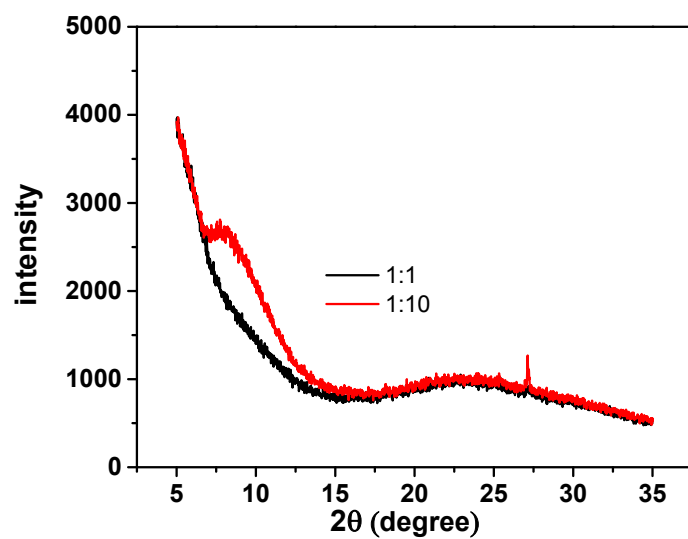

**Figure S4.** Power X-ray diffraction pattern of the P3HT/TCNQ hybrid.
